# Supplementary material for: Layer-structured K0.5Mn0.8Cu0.1Mg0.1O2 for high-performance potassium-ion batteries by alleviating the phase transformation
Source: Royal Society of Chemistry journal article supplement (doi:10.1039/d4ta00423j), 2024-01-01
Supplement: d4ta00423j1.pdf [file d4ta00423j1.pdf]

# Supporting Information

## Layer-structured $\text{K}_{0.5}\text{Mn}_{0.8}\text{Cu}_{0.1}\text{Mg}_{0.1}\text{O}_2$ for High-performance Potassium-ion Batteries by Alleviating the Phase Transformation

Hong Chen<sup>‡</sup>, Xuan-Wen Gao<sup>‡</sup>, Qi Li, Run-Ze Niu, Shuai-Shuai Wang, Qin-Fen Gu, Jian-jia Mu, Wen-Bin Luo\*

Institute for Energy Electrochemistry and Urban Mines Metallurgy, School of Metallurgy, Northeastern University, Liaoning, 110819, China

Corresponding Authors

E-mail: luowenbin@smm.neu.edu.cn

### Experimental

#### Materials preparation

The KMCMO cathode material was synthesized through a sol-gel method and a solid-state reaction at high temperature. The raw materials used were potassium carbonate, manganese acetate tetrahydrate, copper acetate, and magnesium acetate tetrahydrate, with citric acid acting as a chelating agent. The molar ratio of the raw materials was 0.25:0.8:0.1:0.1:12. To synthesize the KMCMO material, citric acid was dissolved in deionized water and heated. A mixed solution of  $\text{Mn}^{2+}$ ,  $\text{Cu}^{2+}$ , and  $\text{Mg}^{2+}$  dissolved in water, as well as a  $\text{K}^+$  solution dissolved in water, were added to the citric acid solution with magnetic stirring. The mixture was stirred until a wet gel formed, then dried and ground. The resulting mixture was calcined at high temperatures. The KMCMO product was cooled and transferred into an argon-filled glovebox to prevent moisture absorption. For comparison, other materials were synthesized using the same procedure but without the addition of reagents containing Cu/Mg.

#### Material Characterization

The crystal structure analysis was conducted utilizing a Bruker D8 Advance Diffractometer, employing a scanning rate of  $5^\circ \text{ min}^{-1}$ . The resulting XRD patterns were refined through the utilization of GSAS software. In situ XRD analysis was also performed on the electrodes within the  $2\theta$  range of  $10^\circ$  to  $45^\circ$ , employing a scanning rate of  $5^\circ \text{ min}^{-1}$ . The morphology and microstructure of the samples were examined using scanning electron microscopy (SEM SU8220, Hitachi High-Tech Company) and high-resolution transmission electron microscopy (HRTEM). The elemental composition of the samples was analysed through energy dispersive spectrometry (EDS), and elemental maps were generated utilizing a super-X EDS detector system (Bruker; Super-X, USA). Furthermore, the elemental chemical compositions of the materials were determined using X-ray photoelectron spectroscopy (XPS, Thermo ESCALAB 250XI Al K  $\alpha$  X-ray source).

#### Electrochemical Tests

The electrodes were prepared by combining the as-synthesized material (80 wt.%), acetylene black (10 wt.%), and polytetrafluoroethylene (10 wt.%) in N-methyl-2-pyrrolidone. The resulting slurry was then cast onto an aluminium foil and dried at  $120^\circ \text{C}$  under vacuum overnight. The dried film was cut into discs with a diameter of 12 mm. The electrode film, coated on the aluminium foil, was weighed and assembled into a 2032 coin-cell with a glass filter. A potassium metal foil was used as the counter/reference electrode. The cathode active mass loading was approximately  $1.5\text{--}2.0 \text{ mg cm}^{-2}$  per electrode. In the K-ion full cell assembly, a cathode-to-anode mass loading ratio of 1.2:1 was maintained. The electrolyte consisted of 0.8 M potassium hexafluorophosphate ( $\text{KPF}_6$ , 99.5%, Sigma-Aldrich) dissolved in a mixture of ethylene carbonate and propylene carbonate (EC/PC, 1/1). Cyclic voltammetry (CV) tests were conducted using an LANHE instrument electrochemical workstation, with scan rates specified,

within a voltage range of 1.5 to 4 V versus  $K^+/K$ . Electrochemical impedance spectroscopy (EIS) was performed using a Princeton 2273 test measurement system, with frequencies ranging from 100 KHz to 10 mHz.

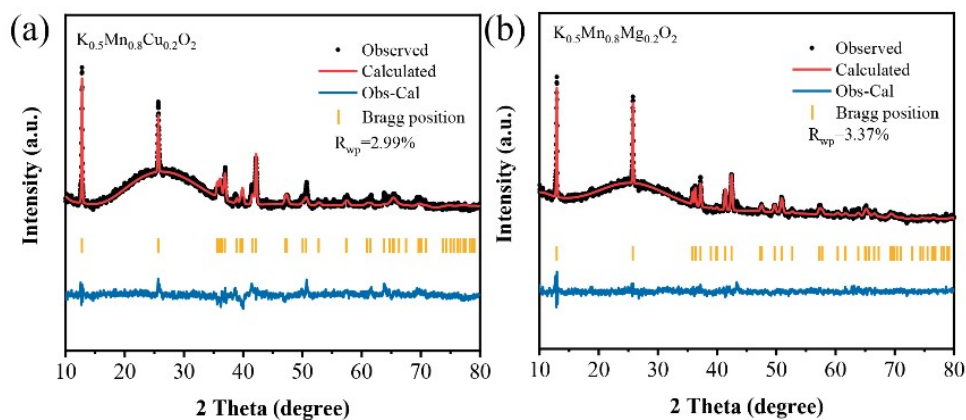

**Figure S1.** Rietveld refinement results of KMMO (a) and KMCO (b)

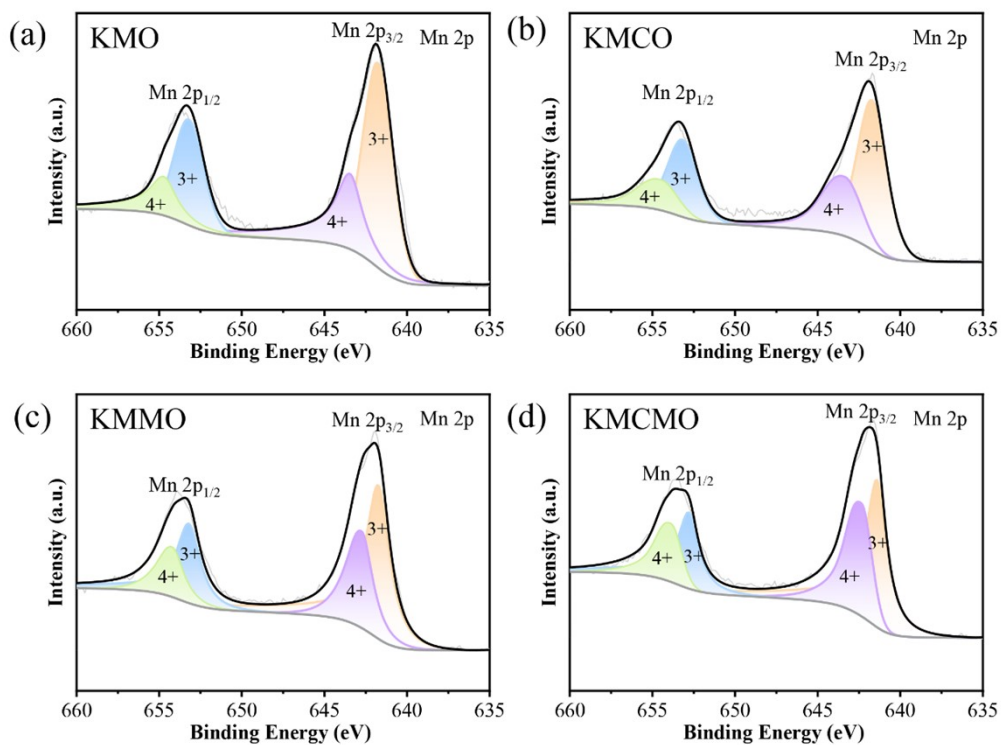

**Figure S2.** Mn 2p XPS spectrum and fitting lines for a) KMO, b) KMCO, c) KMMO and d) KMCMO.

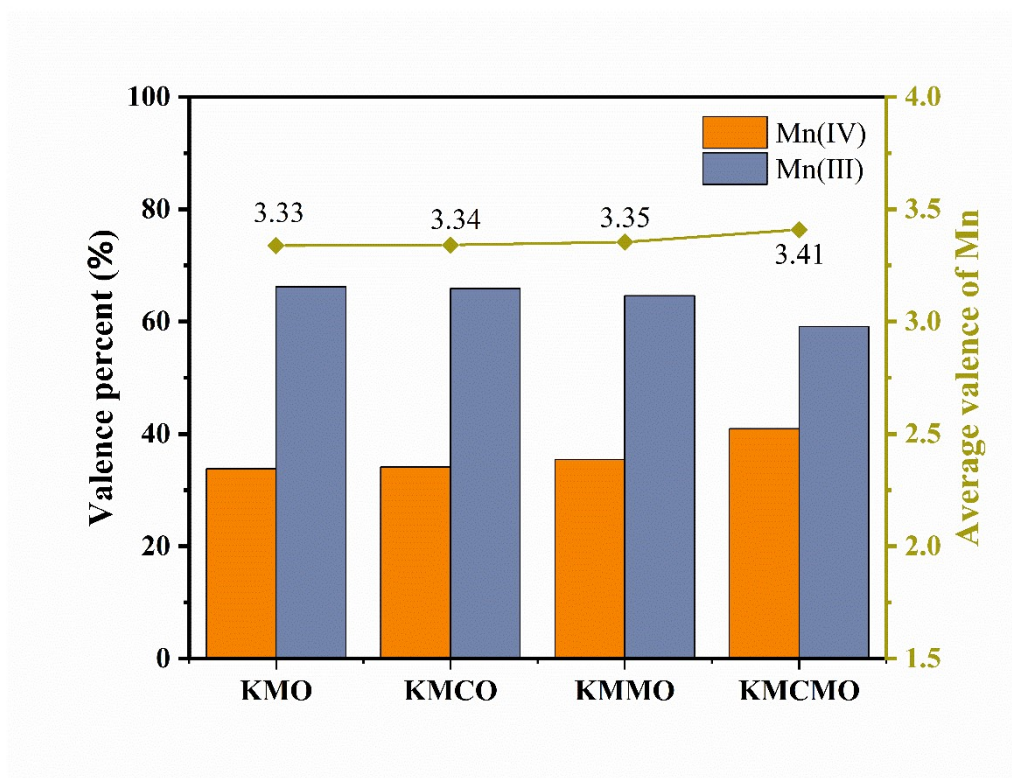

**Figure S3.** Corresponding statistics of fitting results and average valences of Mn

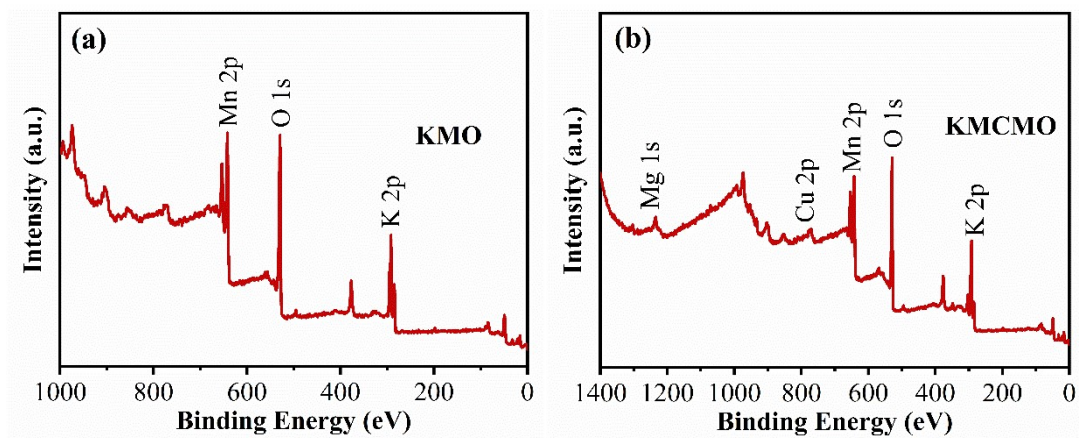

**Figure S4.** XPS spectra of full spectrum of KMO and KMCMO samples.

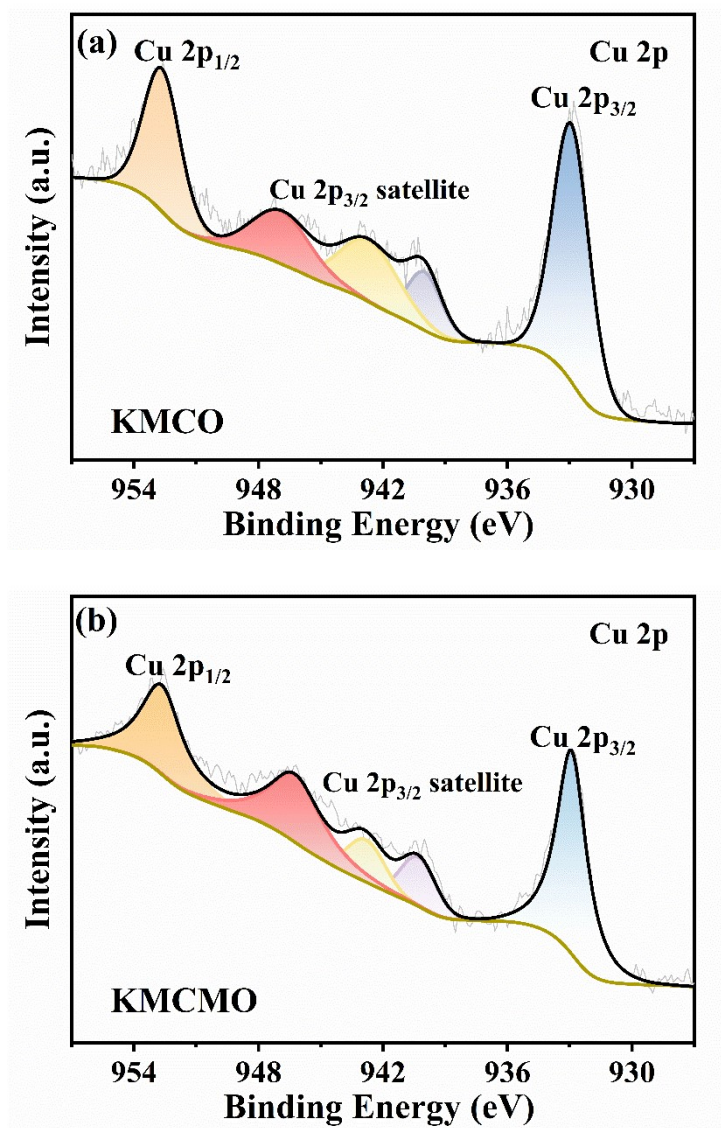

Figure S5. XPS spectra of Cu 2p of KMCO and KMCMO samples.

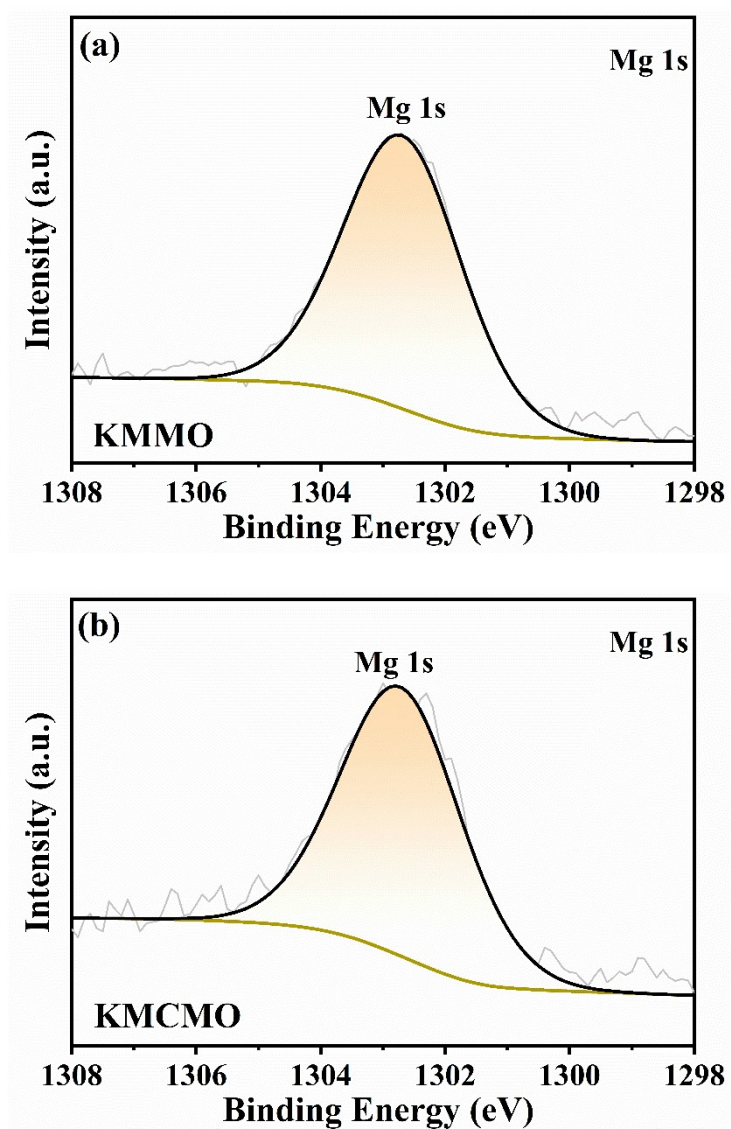

Figure S6. XPS spectra of Mg 1s of KMMO and KMCMO samples.

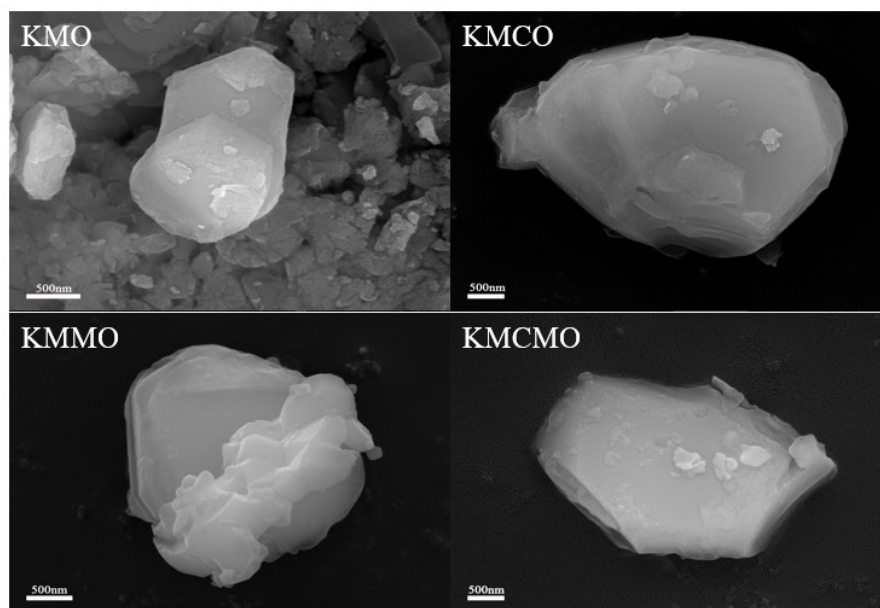

**Figure S7.** SEM of KMO, KMCO, KMMO and KMCMO samples.

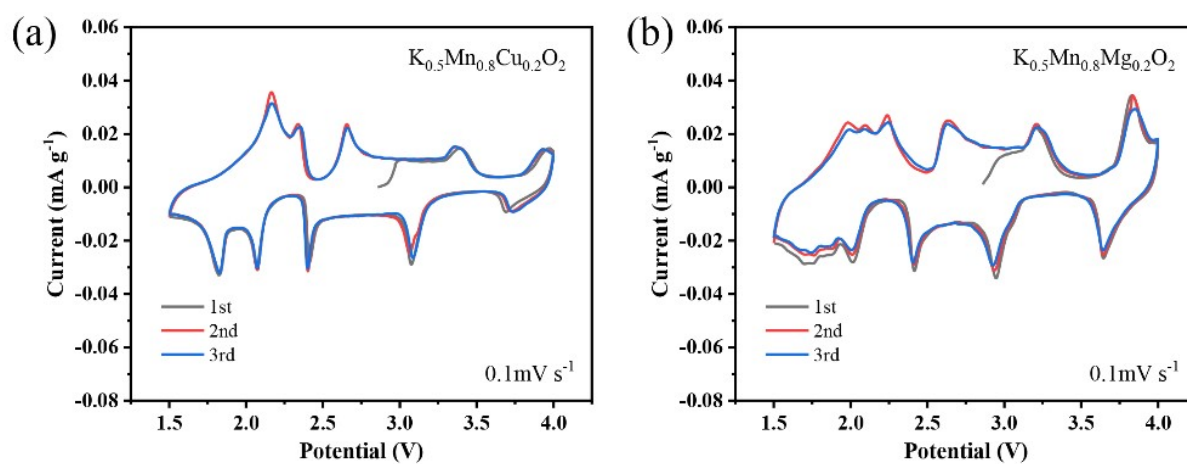

**Figure S8.** CV of KMMO and KMCMO samples.

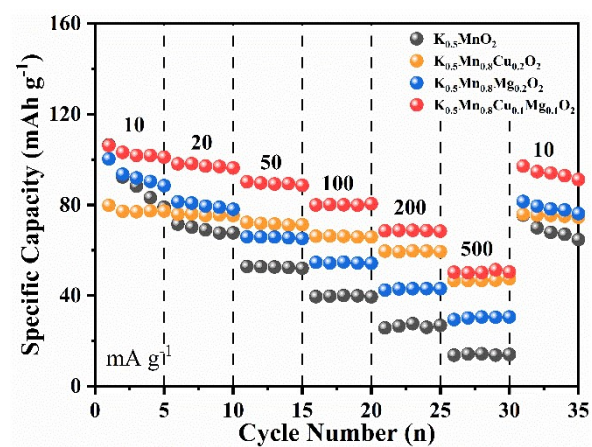

**Figure S9.** Rate performances of KMO, KMCO, KMMO and KMCMO samples

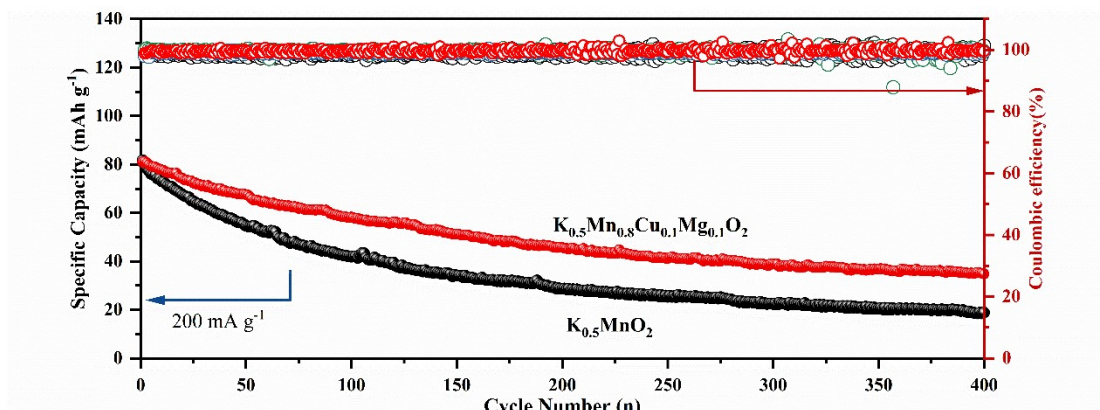

Figure S10. Cycling performances of KMO and KMCMO samples.

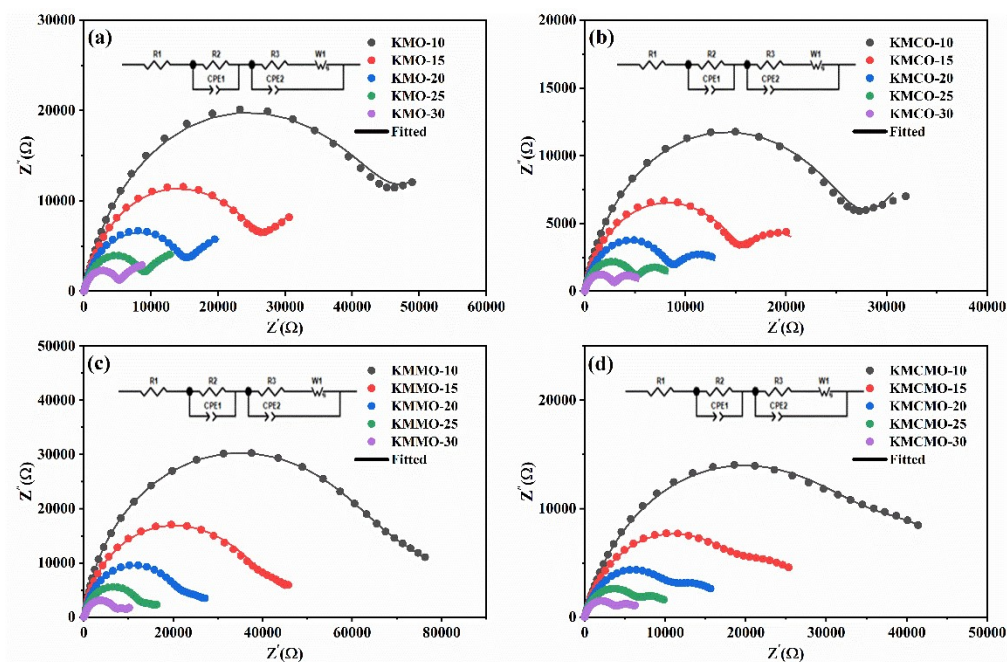

Figure S11. Nyquist plots of f KMO, KMCO, KMMO and KMCMO samples at different temperature.

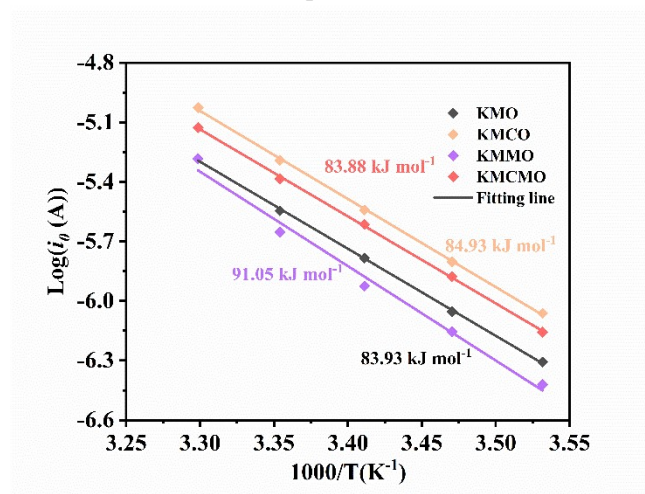

Figure S12. The fitting result of f KMO, KMCO, KMMO and KMCMO samples for Nyquist plots.

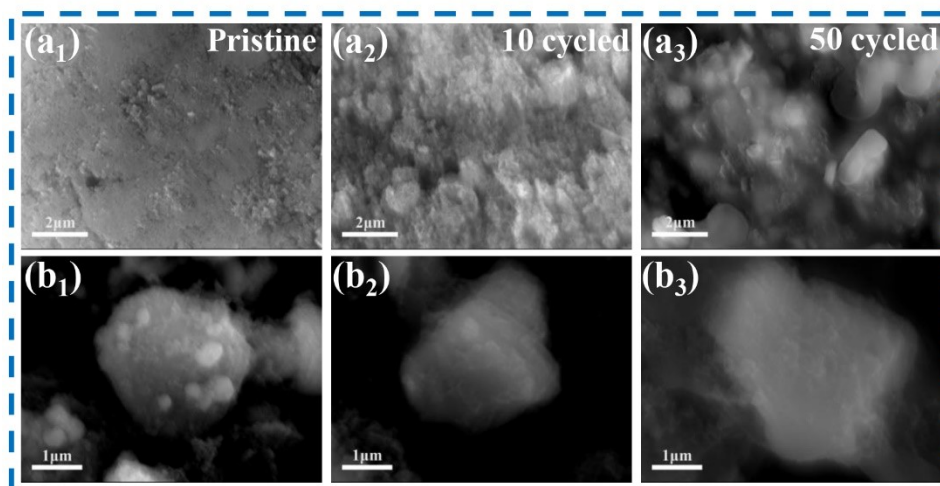

**Figure S13.** Evolution of particle cracks. SEM images of the cross section of (a1-a3) KMO electrode and (b1-b3) KMCMO electrode at  $200 \text{ mA g}^{-1}$  after 0, 10, 50 cycles.

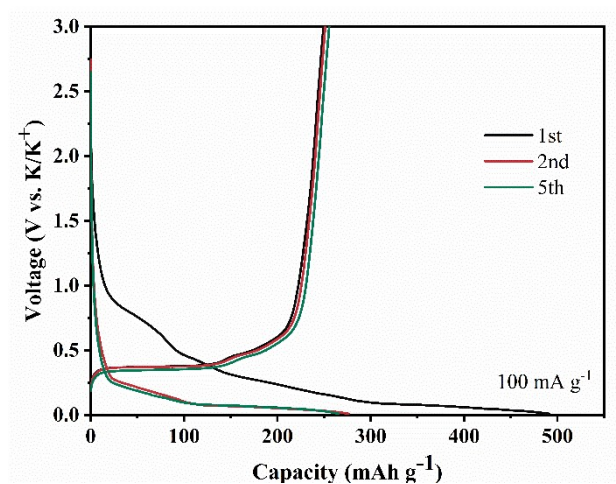

**Figure S14.** Electrochemical performance of graphite in half-cell.

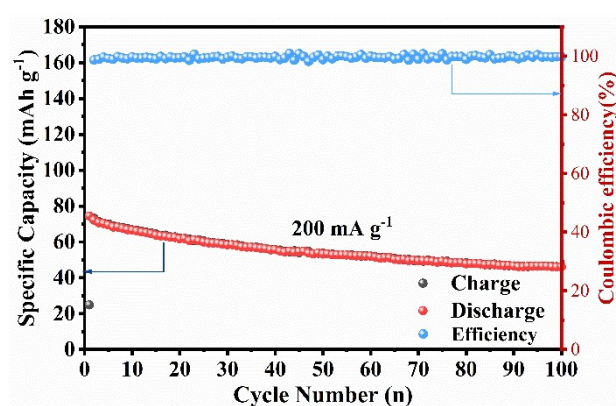

**Figure S15.** Electrochemical performance of KMO graphite in Full-cell at  $200 \text{ mA g}^{-1}$ .

**Table S1.** Structural parameters of KMO, KMCO, KMMO and KMCMO samples from Rietveld refinement.

| Samples                                                                 | a     | b     | c     |
|-------------------------------------------------------------------------|-------|-------|-------|
| $\text{K}_{0.5}\text{MnO}_2$                                            | 5.047 | 2.844 | 7.069 |
| $\text{K}_{0.5}\text{Mn}_{0.8}\text{Cu}_{0.2}\text{O}_2$                | 5.046 | 2.862 | 7.090 |
| $\text{K}_{0.5}\text{Mn}_{0.8}\text{Mg}_{0.2}\text{O}_2$                | 5.103 | 2.883 | 7.163 |
| $\text{K}_{0.5}\text{Mn}_{0.8}\text{Cu}_{0.1}\text{Mg}_{0.1}\text{O}_2$ | 5.049 | 2.931 | 7.213 |

**Table S2.** Electrochemical data of some reported K half batteries containing layered oxide cathodes.

| No. | Samples                                                                                             | Synthesis method                 | Current density (mA g <sup>-1</sup> ) | Capacity (mAh g <sup>-1</sup> ) | Refs. |
|-----|-----------------------------------------------------------------------------------------------------|----------------------------------|---------------------------------------|---------------------------------|-------|
| 1   | P3-<br>$\text{K}_{0.67}\text{Ni}_{0.17}\text{Co}_{0.17}\text{Mn}_{0.66}\text{O}_2$                  | Co-precipitation and solid-state | 20                                    | 77                              | 1     |
| 2   | P2- $\text{K}_{0.75}\text{Mn}_{0.8}\text{Ni}_{0.1}\text{Fe}_{0.1}\text{O}_2$                        | Electrochemical ion-exchange     | 100                                   | 80                              | 2     |
| 3   | P3/P2<br>$\text{K}_{0.37}\text{Na}_{0.3}\text{Ni}_{0.17}\text{Co}_{0.17}\text{Mn}_{0.66}\text{O}_2$ | Co-precipitation and solid-state | 20                                    | 86                              | 3     |
| 4   | $\text{K}_{0.45}\text{Ni}_{0.1}\text{Fe}_{0.1}\text{Mn}_{0.8}\text{O}_2$                            | Co-precipitation and solid-state | 20                                    | 90                              | 4     |
| 5   | $\text{Li}_{0.27}\text{K}_{0.72}\text{Ni}_{0.6}\text{Co}_{0.2}\text{Mn}_{0.2}\text{O}_2$            | electrochemical exchange         | 10                                    | 86.9                            | 5     |
| 6   | $\text{K}_{0.5}\text{MnO}_2$                                                                        | solid-state                      | 20                                    | 80                              | 6     |
| 7   | $\text{K}_{0.45}\text{MnO}_2$                                                                       | Co-precipitation and solid-state | 200                                   | 51.2                            | 7     |
| 8   | $\text{K}_{0.4}\text{MnO}_2 \cdot 0.36\text{H}_2\text{O}$                                           | solid-state                      | 80                                    | 90                              | 8     |
| 9   | $\text{K}_x\text{CrO}_2$                                                                            | solid-state                      | 150                                   | 80                              | 9     |
| 10  | $\text{K}_{0.5}\text{Mn}_{0.8}\text{Cu}_{0.1}\text{Mg}_{0.1}\text{O}_2$                             | sol-gel method                   | 200                                   | 85.1                            | This  |

## References

1. C. L. Liu, S. H. Luo, H. B. Huang, Z. Y. Wang, A. M. Hao, Y. C. Zhai and Z. W. Wang, *Electrochem Commun*, 2017, **82**, 150-154.
2. J. Y. Hwang, J. Kim, T. Y. Yu, H. G. Jung, J. Kim, K. H. Kim and Y. K. Sun, *J. Mater. Chem. A*, 2019, **7**, 21362-21370.
3. C. L. Liu, S. H. Luo, H. B. Huang, Y. C. Zhai and Z. W. Wang, *Electrochim Acta*, 2018, **286**, 114-122.
4. R. B. Dang, Q. B. Yan, E. Y. Zhao, N. Li, K. Wu, Z. J. Chen, Z. H. Wu, X. F. Liu, Z. B. Hu and X. L. Xiao, *Sci. China Mater.*, 2022, **65**, 1741-1750.
5. W. Sohn, J. S. Chae, G. H. Lim and K. C. Roh, *J. Alloy Compd.*, 2022, **898** 162904.
6. H. Kim, D. H. Seo, J. C. Kim, S. H. Bo, L. Liu, T. Shi and G. Ceder, *Adv. Mater.*, 2017, **29** 1702480.
7. C. L. Liu, S. H. Luo, H. B. Huang, Y. C. Zhai and Z. W. Wang, *Chem. Eng. J.*, 2019, **356**, 53-59.
8. A. Gao, M. Li, N. N. Guo, D. P. Qiu, Y. Li, S. H. Wang, X. Lu, F. Wang and R. Yang, *Adv. Energy Mater.*, 2019, **9** 1802739.
9. W. Ko, J. Kim, J. Kang, H. Park, Y. Lee, J. Ahn, B. Ku, M. Choi, H. Ahn, G. Oh, J.-Y. Hwang and J. Kim, *Mater. Today Energy*, 2023, **36** 101356.
